# Supplementary material
Source: publisher site journal article supplement (https://www.dovepress.com/article/607382)
Supplement: Supplementary file 1 [file 607382%20Revised%20Supplementary%20Material.docx]

**Supplementary Table 1 Database-specific search strategies used for literature retrieval**

| **Database** | **Coverage period** | **Search fields** | **Exact search strategy** |
| --- | --- | --- | --- |
| **PubMed** | 2021-2025 | Title/Abstract | (("probiotic*"[Title/Abstract] OR "Lactobacillus"[Title/Abstract] OR "Bifidobacterium"[Title/Abstract] OR "Bacillus"[Title/Abstract] OR "Akkermansia"[Title/Abstract]) AND ("nanoparticle*"[Title/Abstract] OR "nanotechnolog*"[Title/Abstract] OR "nanoencapsulat*"[Title/Abstract] OR "nanocarrier*"[Title/Abstract] OR "liposome*"[Title/Abstract] OR "nanoemulsion*"[Title/Abstract] OR "exosome*"[Title/Abstract] OR "nanobiotic*"[Title/Abstract] OR "metal-organic framework*"[Title/Abstract]) AND ("gut"[Title/Abstract] OR "intestinal"[Title/Abstract] OR "colon"[Title/Abstract] OR "microbiota"[Title/Abstract] OR "microbiome"[Title/Abstract] OR "colitis"[Title/Abstract] OR "gut-brain axis"[Title/Abstract])) AND ("2021/01/01"[Date - Publication] : "2025/12/31"[Date - Publication]) AND (english[Language]) |
| **Scopus** | 2021-2025 | TITLE-ABS-KEY | TITLE-ABS-KEY ( probiotic* OR Lactobacillus OR Bifidobacterium OR Bacillus OR Akkermansia ) AND TITLE-ABS-KEY ( nanoparticle* OR nanotechnolog* OR nanoencapsulat* OR nanocarrier* OR liposome* OR nanoemulsion* OR exosome* OR nanobiotic* OR "metal-organic framework*" ) AND TITLE-ABS-KEY ( gut OR intestinal OR colon OR microbiota OR microbiome OR colitis OR "gut-brain axis" ) AND PUBYEAR > 2020 AND PUBYEAR < 2026 AND ( LIMIT-TO ( LANGUAGE , "English" ) ) |
| **IEEE Xplore** | 2021-2025 | All Metadata | ("All Metadata":"probiotic" OR "All Metadata":"probiotics" OR "All Metadata":"Lactobacillus" OR "All Metadata":"Bifidobacterium" OR "All Metadata":"Bacillus") AND ("All Metadata":"nanotechnology" OR "All Metadata":"nanoencapsulation" OR "All Metadata":"nanocarrier" OR "All Metadata":"nanoparticle" OR "All Metadata":"liposome" OR "All Metadata":"nanoemulsion" OR "All Metadata":"nanobiotic") AND ("All Metadata":"gut" OR "All Metadata":"intestinal" OR "All Metadata":"colon" OR "All Metadata":"microbiota" OR "All Metadata":"microbiome" OR "All Metadata":"colitis" OR "All Metadata":"gut-brain axis") |
| **Google Scholar** | 2021-2025 | Full-text / relevance ranking | Google Scholar was searched using combinations of the following phrase sets: **“**probiotics nanotechnology gut”, “nanoencapsulation of probiotics intestinal delivery”, “nanocarrier probiotics microbiota”, “nanobiotics gut therapeutic applications”, “probiotic nanoparticles colon delivery”, and “nanoencapsulated probiotics immune modulation”. Results were manually screened for relevance, duplicates, and eligibility. |

**Supplementary Table 2 Quality appraisal and risk-of-bias assessment of all studies included in the manuscript**

| **Sr. No.** | **Article title** | **Article type** | **Study design** | **Model** | **Main topic relevant to this review** | **Appraisal tool / approach** | **Key quality concerns** | **Overall quality / risk-of-bias judgment** | **References** |
| --- | --- | --- | --- | --- | --- | --- | --- | --- | --- |
| 1 | Boosting vaccine effectiveness: The groundbreaking role of probiotics | Review article | Narrative review | Not applicable | Role of probiotics in enhancing vaccine-mediated immunity | No assessment needed as article is not a research article. | Not applicable | Not applicable | 1 |
| 2 | The role of probiotics in personalized therapeutics: Advances in gut microbe-driven interventions | Review article | Narrative review | Not applicable | Personalized probiotic therapeutics and gut microbiome interventions | No assessment needed as article is not a research article. | Not applicable | Not applicable | 2 |
| 3 | Next-generation probiotics as novel therapeutics for improving human health: Current trends and future perspectives | Review article | Narrative review | Not applicable | Next-generation probiotics and emerging therapeutic strategies | No assessment needed as article is not a research article. | Not applicable | Not applicable | 3 |
| 4 | Mechanism of actions of probiotics on type 2 diabetes: Development and complications | Review article | Narrative review | Not applicable | Probiotic mechanisms in type 2 diabetes management | No assessment needed as article is not a research article. | Not applicable | Not applicable | 4 |
| 5 | Encapsulation of probiotics within double/multiple layer beads/carriers: A concise review | Review article | Narrative review | Not applicable | Double/multiple-layer encapsulation strategies for probiotics | No assessment needed as article is not a research article. | Not applicable | Not applicable | 5 |
| 6 | Application of encapsulation strategies for probiotics: From individual loading to co-encapsulation | Review article | Narrative review | Not applicable | Encapsulation strategies including co-encapsulation of probiotics | No assessment needed as article is not a research article. | Not applicable | Not applicable | 6 |
| 7 | Advanced synbiotic delivery platforms: Integrating prebiotic alginate co-encapsulants for probiotic protection in functional foods | Original research | In vitro / formulation study | Probiotic strains (not specified); alginate-based synbiotic formulations | Alginate-based synbiotic nanoencapsulation for probiotic protection | Descriptive methodological appraisal | Functional food focus limits direct GI therapeutic translation; incomplete reporting of strain-level survival data; limited statistical detail in published abstract/text | Moderate methodological quality | 7 |
| 8 | Current concepts of Helicobacter pylori infection | Review article | Narrative review | Not applicable | Helicobacter pylori infection: pathogenesis, diagnosis, and treatment | No assessment needed as article is not a research article. | Not applicable | Not applicable | 8 |
| 9 | Multi-strain-probiotic-loaded nanoparticles reduced colon inflammation and orchestrated the expressions of tight junction, NLRP3 inflammasome and caspase-1 genes in DSS-induced colitis model | Original research | In vivo animal study (DSS-induced colitis model) | Mice (DSS-induced colitis); multi-strain probiotic nanoparticles | Nanoparticle-delivered probiotics for colon inflammation and barrier gene modulation | SYRCLE risk-of-bias tool | No randomization or blinding details reported; unclear allocation concealment; limited sample size; single-laboratory setting; outcomes assessed post-sacrifice only | No risk of bias | 9 |
| 10 | Gut microbiota: a promising new target in immune tolerance | Review article | Narrative review | Not applicable | Gut microbiota as a target for immune tolerance modulation | No assessment needed as article is not a research article. | Not applicable | Not applicable | 10 |
| 11 | A systematic review on the dynamic interplay between the immune system and gut microbiome in inflammatory bowel disease patients | Systematic review | Systematic review | Not applicable | Immune–microbiome interactions in IBD | No assessment needed as article is not a research article. | Not applicable | Not applicable | 11 |
| 12 | Probiotics and their applications in functional foods: A health perspective | Review article | Narrative review | Not applicable | Probiotic applications in functional foods and health outcomes | No assessment needed as article is not a research article. | Not applicable | Not applicable | 12 |
| 13 | Boosting immunity through nutrition and gut health: A narrative review on managing allergies and multimorbidity | Review article | Narrative review | Not applicable | Nutritional and gut-health strategies for immune modulation in allergies | No assessment needed as article is not a research article. | Not applicable | Not applicable | 13 |
| 14 | Bacteriocin-producing probiotic lactic acid bacteria in controlling dysbiosis of the gut microbiota | Review article | Narrative review | Not applicable | Bacteriocin-producing probiotics for dysbiosis control | No assessment needed as article is not a research article. | Not applicable | Not applicable | 14 |
| 15 | The role of probiotics and prebiotics in modulating of the gut-brain axis | Review article | Narrative review | Not applicable | Probiotic and prebiotic modulation of the gut–brain axis | No assessment needed as article is not a research article. | Not applicable | Not applicable | 15 |
| 16 | Emerging therapies in inflammatory bowel disease: A comprehensive review | Review article | Narrative review | Not applicable | Emerging therapeutic approaches in IBD | No assessment needed as article is not a research article. | Not applicable | Not applicable | 16 |
| 17 | Nano-encapsulation of probiotics: Need and critical considerations to design new non-dairy probiotic products | Review article | Narrative review | Not applicable | Design considerations for nanoencapsulated non-dairy probiotic products | No assessment needed as article is not a research article. | Not applicable | Not applicable | 17 |
| 18 | Lipid nanoparticles: An effective tool to improve the bioavailability of nutraceuticals | Review article | Narrative review | Not applicable | Lipid nanoparticles for improving bioavailability of nutraceuticals | No assessment needed as article is not a research article. | Not applicable | Not applicable | 18 |
| 19 | The gut–brain connection: microbes' influence on mental health and psychological disorders | Review article | Narrative review | Not applicable | Gut microbiota influence on mental health via gut–brain axis | No assessment needed as article is not a research article. | Not applicable | Not applicable | 19 |
| 20 | Survival of probiotic bacteria nanoencapsulated within biopolymers in a simulated gastrointestinal model | Original research | In vitro / simulated GI digestion study | Probiotic bacteria; biopolymer nanoencapsulation; simulated GI model | Nanoencapsulation of probiotics for survival under simulated GI conditions | Descriptive methodological appraisal | Simulated GI model may not fully replicate in vivo conditions; limited strain diversity tested; no colonization or in vivo outcome assessment | Moderate methodological quality | 20 |
| 21 | Advancement in nanobubble technology: enhancing drug and nutraceutical delivery with focus on bioavailability, targeted therapy, safety, and sustainability | Review article | Narrative review | Not applicable | Nanobubble technology for drug and nutraceutical delivery enhancement | No assessment needed as article is not a research article. | Not applicable | Not applicable | 21 |
| 22 | Probiotics and their role in the management of Type 2 diabetes mellitus (short-term versus long-term effect): A systematic review and meta-analysis | Systematic review / Meta-analysis | Systematic review and meta-analysis | Not applicable | Probiotic efficacy in type 2 diabetes mellitus management | No assessment needed as article is not a research article. | Not applicable | Not applicable | 22 |
| 23 | Impact of microbial metabolites on microbiota–gut–brain axis in inflammatory bowel disease | Review article | Narrative review | Not applicable | Microbial metabolites and gut–brain axis in IBD | No assessment needed as article is not a research article. | Not applicable | Not applicable | 23 |
| 24 | Advances in leaf plant bioactive compounds: Modulation of chronic inflammation related to obesity | Review article | Narrative review | Not applicable | Plant bioactive compounds and anti-inflammatory effects in obesity | No assessment needed as article is not a research article. | Not applicable | Not applicable | 24 |
| 25 | Gut microbiota mediated T cells regulation and autoimmune diseases | Review article | Narrative review | Not applicable | Gut microbiota regulation of T cells in autoimmune disease | No assessment needed as article is not a research article. | Not applicable | Not applicable | 25 |
| 26 | Understanding of probiotic origin antimicrobial peptides: a sustainable approach ensuring food safety | Review article | Narrative review | Not applicable | Probiotic-derived antimicrobial peptides for food safety | No assessment needed as article is not a research article. | Not applicable | Not applicable | 26 |
| 27 | The gut microbiome in enteric viral infections: Underlying mechanisms and therapeutic approaches | Review article | Narrative review | Not applicable | Gut microbiome in enteric viral infections and therapeutic interventions | No assessment needed as article is not a research article. | Not applicable | Not applicable | 27 |
| 28 | Lifelong partners: Gut microbiota-immune cell interactions from infancy to old age | Review article | Narrative review | Not applicable | Gut microbiota–immune cell interactions across the lifespan | No assessment needed as article is not a research article. | Not applicable | Not applicable | 28 |
| 29 | Gut microbiota and intestinal immunity interaction in ulcerative colitis and its application in treatment | Review article | Narrative review | Not applicable | Gut microbiota–immunity interactions in ulcerative colitis | No assessment needed as article is not a research article. | Not applicable | Not applicable | 29 |
| 30 | Effects of probiotics on non-alcoholic fatty liver disease: a review of human clinical trials | Review article | Narrative review of clinical trials | Not applicable | Probiotic effects on NAFLD: synthesis of human clinical trial evidence | No assessment needed as article is not a research article. | Not applicable | Not applicable | 30 |
| 31 | Host-gut microbiota metabolic interactions and their role in precision diagnosis and treatment of gastrointestinal cancers | Review article | Narrative review | Not applicable | Host–microbiota metabolic interactions in gastrointestinal cancer | No assessment needed as article is not a research article. | Not applicable | Not applicable | 31 |
| 32 | Being a better version of yourself: genetically engineered probiotic bacteria as host defense enhancers in the control of intestinal pathogens | Review article | Narrative review | Not applicable | Genetically engineered probiotics as host defense and pathogen control agents | No assessment needed as article is not a research article. | Not applicable | Not applicable | 32 |
| 33 | Evaluating the efficacy of probiotics in IBS treatment using a systematic review of clinical trials and multi-criteria decision analysis | Systematic review | Systematic review with multi-criteria decision analysis | Not applicable | Probiotic efficacy in IBS: systematic synthesis of clinical trials | No assessment needed as article is not a research article. | Not applicable | Not applicable | 33 |
| 34 | Nanoencapsulation for probiotic delivery | Review article | Narrative review / perspective | Not applicable | Nanoencapsulation strategies for improving probiotic delivery | No assessment needed as article is not a research article. | Not applicable | Not applicable | 34 |
| 35 | Effects of probiotics on gut microbiota: An overview | Review article | Narrative review | Not applicable | Probiotic effects on gut microbiota composition and diversity | No assessment needed as article is not a research article. | Not applicable | Not applicable | 35 |
| 36 | Navigating a challenging path: Precision disease treatment with tailored oral nano-armor-probiotics | Review article | Narrative review | Not applicable | Oral nanobiotic systems for precision disease treatment via gut delivery | No assessment needed as article is not a research article. | Not applicable | Not applicable | 36 |
| 37 | Recent advances in the nanoshells approach for encapsulation of single probiotics | Review article | Narrative review | Not applicable | Nanoshell-based single-cell probiotic encapsulation technologies | No assessment needed as article is not a research article. | Not applicable | Not applicable | 37 |
| 38 | The impact of probiotics on oxidative stress and inflammatory markers in patients with diabetes: a meta-research of meta-analysis studies | Systematic review / Meta-analysis | Meta-research (meta-analysis of meta-analyses) | Not applicable | Probiotic effects on oxidative stress and inflammation in diabetic patients | No assessment needed as article is not a research article. | Not applicable | Not applicable | 38 |
| 39 | Mechanism and applications of vagus nerve stimulation | Review article | Narrative review | Not applicable | Vagus nerve stimulation mechanisms and gut–brain axis relevance | No assessment needed as article is not a research article. | Not applicable | Not applicable | 39 |
| 40 | Advances in polysaccharide-based probiotic delivery systems: A review | Review article | Narrative review | Not applicable | Polysaccharide-based probiotic delivery systems | No assessment needed as article is not a research article. | Not applicable | Not applicable | 40 |
| 41 | Gut microbiota and irritable bowel syndrome: Status and prospect | Review article | Narrative review | Not applicable | Gut microbiota and IBS: current evidence and future directions | No assessment needed as article is not a research article. | Not applicable | Not applicable | 41 |
| 42 | Regulatory T cells and their role in allergic disease | Review article | Narrative review | Not applicable | Regulatory T cells in gut-immune–allergy axis | No assessment needed as article is not a research article. | Not applicable | Not applicable | 42 |
| 43 | Human microbiome as an immunoregulatory axis: Mechanisms, dysbiosis, and therapeutic modulation | Review article | Narrative review | Not applicable | Human microbiome as immunoregulatory axis; dysbiosis and therapeutic modulation | No assessment needed as article is not a research article. | Not applicable | Not applicable | 43 |
| 44 | Anti-inflammatory and immunomodulatory effects of probiotics in gut inflammation: A door to the body | Review article | Narrative review | Not applicable | Anti-inflammatory and immunomodulatory probiotic effects in gut inflammation | No assessment needed as article is not a research article. | Not applicable | Not applicable | 44 |
| 45 | Current status of probiotic and related health benefits | Review article | Narrative review | Not applicable | Current evidence on probiotics and their health benefits | No assessment needed as article is not a research article. | Not applicable | Not applicable | 45 |
| 46 | Stability of probiotics through encapsulation: Comparative analysis of current methods and solutions | Review article | Narrative review | Not applicable | Comparative analysis of encapsulation methods for probiotic stability | No assessment needed as article is not a research article. | Not applicable | Not applicable | 46 |
| 47 | Efficacy and safety of probiotics in geriatric patients with constipation: Systematic review and meta-analysis | Systematic review / Meta-analysis | Systematic review and meta-analysis | Not applicable | Probiotic efficacy and safety for constipation in geriatric patients | No assessment needed as article is not a research article. | Not applicable | Not applicable | 47 |
| 48 | Nanoparticle therapeutics in clinical perspective: Classification, marketed products, and regulatory landscape | Review article | Narrative review | Not applicable | Clinical classification and regulatory landscape of nanoparticle therapeutics | No assessment needed as article is not a research article. | Not applicable | Not applicable | 48 |
| 49 | Gut microbiota, intestinal permeability, and systemic inflammation: A narrative review | Review article | Narrative review | Not applicable | Gut microbiota, intestinal permeability, and systemic inflammation | No assessment needed as article is not a research article. | Not applicable | Not applicable | 49 |
| 50 | Intestinal barrier permeability: The influence of gut microbiota, nutrition, and exercise | Review article | Narrative review | Not applicable | Influences of microbiota, diet, and exercise on intestinal barrier permeability | No assessment needed as article is not a research article. | Not applicable | Not applicable | 50 |
| 51 | Chitosan nanoparticles: Green synthesis, biological activities, and sustainable frontiers in targeted drug delivery and cancer nanomedicine – A comprehensive review | Review article | Narrative review | Not applicable | Chitosan nanoparticles: synthesis, properties, and drug delivery applications | No assessment needed as article is not a research article. | Not applicable | Not applicable | 51 |
| 52 | Green synthesis of biocompatible Fe3O4 magnetic nanoparticles using Citrus Sinensis peels extract for their biological activities and magnetic-hyperthermia applications | Original research | In vitro study (green synthesis and biological activity characterization) | Fe3O4 magnetic nanoparticles; Citrus sinensis peel extract | Green synthesis of iron oxide nanoparticles; biological activities | Descriptive methodological appraisal | Study is focused on nanoparticle synthesis and hyperthermia; no probiotic delivery component; limited in vivo validation; minimal statistical detail for biological assays | Moderate methodological quality | 52 |
| 53 | Encapsulation of multi-strain probiotics using nanochitosan as a potential immunomodulator in broiler chicken | Original research | In vivo animal study (broiler chicken model) | Broiler chickens; nanochitosan-encapsulated multi-strain probiotics | Nanochitosan encapsulation of probiotics as immunomodulator in poultry | SYRCLE risk-of-bias tool | Animal model is poultry (not rodent or human); immunomodulatory outcomes may not translate directly; limited reporting of randomization and blinding; no long-term follow-up | No risk of bias | 53 |
| 54 | Probiotics and the intestinal tight junction barrier function | Review article | Narrative review | Not applicable | Probiotic effects on intestinal tight junction barrier integrity | No assessment needed as article is not a research article. | Not applicable | Not applicable | 54 |
| 55 | Gut microbiome-centric nutritional strategies in inflammatory bowel disease: Modulating dysbiosis for therapeutic benefit | Review article | Narrative review | Not applicable | Nutritional strategies targeting gut microbiome dysbiosis in IBD | No assessment needed as article is not a research article. | Not applicable | Not applicable | 55 |
| 56 | Encapsulation of a probiotic bacterial strain in a biocompatible iron(III) fumarate matrix | Original research | In vitro / formulation study | Lactiplantibacillus plantarum 299v; iron(III) fumarate MOF matrix | MOF-based encapsulation of probiotic for stability enhancement | Descriptive methodological appraisal | Single-strain study; stability tested only in saline, lysozyme, and pepsin without full GI simulation or in vivo validation; no long-term stability or safety data | Moderate methodological quality | 56 |
| 57 | Probiotic-based nanoparticles for targeted microbiota modulation and immune restoration in bacterial pneumonia | Original research | In vivo animal study (murine bacterial pneumonia model) | Mice (bacterial pneumonia model); probiotic-based nanoparticles | Probiotic nanoparticles for microbiota modulation and immune restoration in pneumonia | SYRCLE risk-of-bias tool | Blinding and randomization not clearly described; single laboratory study; extrapolation to human respiratory or gut conditions is limited; no clinical translational data | No risk of bias | 57 |
| 58 | Recent advances in the encapsulation of probiotics as functional foods for colorectal cancer prevention | Review article | Narrative review | Not applicable | Probiotic encapsulation for colorectal cancer prevention | No assessment needed as article is not a research article. | Not applicable | Not applicable | 58 |
| 59 | Ingestion of Lactobacillus helveticus WHH1889 improves depressive and anxiety symptoms induced by chronic unpredictable mild stress in mice | Original research | In vivo animal study (chronic unpredictable mild stress mouse model) | Mice (chronic unpredictable mild stress model); Lactobacillus helveticus WHH1889 | Probiotic effects on depression and anxiety via gut–brain axis in animal model | SYRCLE risk-of-bias tool | Randomization and blinding inadequately described; single-strain, single-laboratory study; outcome measures rely on behavioural tests with inherent variability; no human translational data | No risk of bias | 59 |
| 60 | Impact of probiotics on the prevention and treatment of gastrointestinal diseases in the pediatric population | Review article | Narrative review | Not applicable | Probiotic effects on gastrointestinal diseases in pediatric populations | No assessment needed as article is not a research article. | Not applicable | Not applicable | 60 |
| 61 | Strengthening integrative microbiome research through regional leadership | Other (perspective/commentary) | Perspective / commentary | Not applicable | Integrative microbiome research and regional scientific leadership | No assessment needed as article is not a research article. | Not applicable | Not applicable | 61 |
| 62 | Comparative survival study of Bacillus coagulans and Enterococcus faecium microencapsulated in chitosan-alginate nanoparticles in simulated gastrointestinal condition | Original research | In vitro / simulated GI digestion study | Bacillus coagulans and Enterococcus faecium; chitosan-alginate nanoparticles; simulated GI model | Chitosan-alginate nanoencapsulation for probiotic survival under simulated GI conditions | Descriptive methodological appraisal | Simulated GI model does not fully replicate in vivo transit; only two bacterial strains compared; limited mucoadhesion and in vivo colonization data; no long-term stability evaluation | Moderate methodological quality | 62 |
| 63 | Chitosan-based formulations for therapeutic applications: A recent overview | Review article | Narrative review | Not applicable | Chitosan-based formulations in therapeutic and delivery applications | No assessment needed as article is not a research article. | Not applicable | Not applicable | 63 |
| 64 | How do intestinal probiotics restore the intestinal barrier? | Review article | Narrative review | Not applicable | Mechanisms by which probiotics restore intestinal barrier integrity | No assessment needed as article is not a research article. | Not applicable | Not applicable | 64 |
| 65 | Commercial and regulatory frameworks for postbiotics: an industry-oriented scientific perspective for non-viable microbial ingredients conferring beneficial physiological effects | Other (perspective/commentary) | Industry-oriented perspective | Not applicable | Regulatory and commercial frameworks for postbiotics | No assessment needed as article is not a research article. | Not applicable | Not applicable | 65 |
| 66 | Microencapsulation of Lactobacillus plantarum with improved survivability using pufferfish skin gelatin-based wall materials | Original research | In vitro / formulation study | Lactobacillus plantarum; pufferfish skin gelatin-based microencapsulation; simulated GI conditions | Gelatin-based microencapsulation for improved probiotic survival | Descriptive methodological appraisal | Limited strain diversity; no in vivo validation; gelatin sourced from non-conventional marine organism may limit generalizability; encapsulation efficiency and release kinetics require further optimization | Moderate methodological quality | 66 |
| 67 | Micro- and nanoencapsulation of probiotics: Exploring their impact on animal-origin foods | Review article | Narrative review | Not applicable | Micro- and nanoencapsulation of probiotics in animal-origin food products | No assessment needed as article is not a research article. | Not applicable | Not applicable | 67 |
| 68 | Probiotics intervention in colorectal cancer: From traditional approaches to novel strategies | Review article | Narrative review | Not applicable | Probiotic strategies in colorectal cancer prevention and treatment | No assessment needed as article is not a research article. | Not applicable | Not applicable | 68 |
| 69 | Probiotics in poultry: A comprehensive review | Review article | Narrative review | Not applicable | Probiotic use in poultry health and performance | No assessment needed as article is not a research article. | Not applicable | Not applicable | 69 |
| 70 | Layer-by-layer coated probiotics with chitosan and liposomes demonstrate improved stability and antioxidant properties in vitro | Original research | In vitro / formulation study | Probiotic cells; chitosan and liposome layer-by-layer coating; in vitro conditions | Layer-by-layer nanoshell coating of probiotics for stability and antioxidant protection | Descriptive methodological appraisal | In vitro study only; no GI simulation or in vivo assessment; antioxidant assay conditions may not reflect intestinal environment; single-laboratory results require external validation | Moderate methodological quality | 70 |
| 71 | Probiotic gastrointestinal transit and colonization after oral administration: A long journey | Review article | Narrative review | Not applicable | Probiotic gastrointestinal transit, survival, and colonization mechanisms | No assessment needed as article is not a research article. | Not applicable | Not applicable | 71 |
| 72 | Milk exosome-based delivery system for probiotic encapsulation that enhances the gastrointestinal resistance and adhesion of probiotics | Original research | In vitro / simulated GI digestion and adhesion study | Akkermansia muciniphila, Bifidobacterium animalis subsp. lactis BB-12, Lactiplantibacillus plantarum Q7; milk exosome-based coating (mExo@DSPE-PEG-PBA); simulated GI conditions | Milk exosome-based nanocoating for improving probiotic GI resistance and adhesion | Descriptive methodological appraisal | In vitro / simulated GI model only; no in vivo validation; encapsulation efficiency and adhesion assessed under non-physiological simplifications; long-term safety and translational data absent | Moderate methodological quality | 72 |
| 73 | Nanoencapsulation of nutraceuticals: Enhancing stability and bioavailability in functional foods | Review article | Narrative review | Not applicable | Nanoencapsulation strategies for nutraceutical stability and bioavailability in food systems | No assessment needed as article is not a research article. | Not applicable | Not applicable | 73 |
| 74 | Mucoadhesion across scales: Towards the design of protein-based adhesives | Review article | Narrative review | Not applicable | Mucoadhesion mechanisms relevant to nanocarrier retention at mucosal surfaces | No assessment needed as article is not a research article. | Not applicable | Not applicable | 74 |
| 75 | Role of probiotics in prevention and treatment of enteric infections: A comprehensive review | Review article | Narrative review | Not applicable | Probiotic role in prevention and treatment of enteric infections | No assessment needed as article is not a research article. | Not applicable | Not applicable | 75 |
| 76 | Microencapsulation: Probiotics, prebiotics, and nutraceuticals | Review article | Narrative review | Not applicable | Microencapsulation of probiotics, prebiotics, and nutraceuticals | No assessment needed as article is not a research article. | Not applicable | Not applicable | 76 |
| 77 | Microencapsulation techniques for probiotic formulations: Current scenario and future perspective | Review article | Narrative review | Not applicable | Current microencapsulation techniques for probiotic formulations | No assessment needed as article is not a research article. | Not applicable | Not applicable | 77 |
| 78 | Next generation probiotics for human health: An emerging perspective | Review article | Narrative review | Not applicable | Next-generation probiotic concepts and human health applications | No assessment needed as article is not a research article. | Not applicable | Not applicable | 78 |
| 79 | New nanocarrier system for liposomes coated with Lactobacillus acidophilus S-layer protein to improve leu–gln–pro–glu absorption through the intestinal epithelium | Original research | In vitro study (intestinal epithelium cell permeability / absorption study) | Caco-2 cell monolayer; liposomes coated with Lactobacillus acidophilus S-layer protein | S-layer protein-coated liposomes for improved peptide absorption through intestinal epithelium | Descriptive methodological appraisal | Cell line model (Caco-2) may not fully recapitulate in vivo intestinal absorption; peptide-focused rather than probiotic viability-focused; limited multi-strain or in vivo data | Moderate methodological quality | 79 |
| 80 | Nonalcoholic fatty liver disease and gut-liver axis: Role of intestinal microbiota and therapeutic mechanisms | Review article | Narrative review | Not applicable | Gut–liver axis and microbiota role in NAFLD | No assessment needed as article is not a research article. | Not applicable | Not applicable | 80 |
| 81 | Nanoparticle-driven modulation of mucosal immunity and interplay with the microbiome | Review article | Narrative review | Not applicable | Nanoparticle-driven mucosal immunity modulation and microbiome interactions | No assessment needed as article is not a research article. | Not applicable | Not applicable | 81 |
| 82 | Mechanisms and implications of the gut microbial modulation of intestinal metabolic processes | Review article | Narrative review | Not applicable | Gut microbial modulation of intestinal metabolic pathways | No assessment needed as article is not a research article. | Not applicable | Not applicable | 82 |
| 83 | Nanobiotechnology unveils the power of probiotics: A comprehensive review on the synergistic role of probiotics and advanced nanotechnology in enhancing geriatric health | Review article | Narrative review | Not applicable | Synergistic role of probiotics and nanotechnology in geriatric health | No assessment needed as article is not a research article. | Not applicable | Not applicable | 83 |
| 84 | Microbiome dynamics: A paradigm shift in combatting infectious diseases | Review article | Narrative review | Not applicable | Microbiome dynamics and therapeutic applications in infectious disease | No assessment needed as article is not a research article. | Not applicable | Not applicable | 84 |
| 85 | Probiotic consumption alleviates atopic dermatitis-related immune responses in association with gut microbial changes: In vitro and mouse model studies | Original research | Mixed in vitro + in vivo preclinical study | Mouse model (atopic dermatitis); immune cell cultures; probiotic strains | Probiotic effects on atopic dermatitis via gut microbial and immune modulation | Mixed preclinical appraisal (descriptive + SYRCLE-informed) | Blinding and randomization details limited for mouse component; in vitro conditions simplified; atopic dermatitis model may not fully reflect human disease heterogeneity; extrapolation to human nanobiotic delivery is indirect | No risk of bias | 85 |
| 86 | Environmental determinants of immune tolerance in asthma and allergy | Review article | Narrative review | Not applicable | Environmental factors shaping immune tolerance in asthma and allergy | No assessment needed as article is not a research article. | Not applicable | Not applicable | 86 |
| 87 | Transforming medicine with nanobiotechnology: Nanocarriers and their biomedical applications | Review article | Narrative review | Not applicable | Nanocarrier platforms and their biomedical applications in nanobiotechnology | No assessment needed as article is not a research article. | Not applicable | Not applicable | 87 |
| 88 | Probiotics, prebiotics, and synbiotics in nonalcoholic fatty liver disease and alcohol-associated liver disease | Review article | Narrative review | Not applicable | Probiotic, prebiotic, and synbiotic interventions in fatty liver disease | No assessment needed as article is not a research article. | Not applicable | Not applicable | 88 |
| 89 | Recent progress in bioactive loaded hydrogels for food applications | Review article | Narrative review | Not applicable | Bioactive-loaded hydrogels for food and delivery applications | No assessment needed as article is not a research article. | Not applicable | Not applicable | 89 |
| 90 | Gut microbiome-specific nanoparticle-based therapeutics for liver diseases | Review article | Narrative review | Not applicable | Nanoparticle therapeutics targeting gut microbiome in liver disease | No assessment needed as article is not a research article. | Not applicable | Not applicable | 90 |
| 91 | Nanoparticle oral absorption and its clinical translational potential | Review article | Narrative review | Not applicable | Oral nanoparticle absorption mechanisms and clinical translation | No assessment needed as article is not a research article. | Not applicable | Not applicable | 91 |
| 92 | Microbiota in the stomach and application of probiotics to gastroduodenal diseases | Review article | Narrative review | Not applicable | Gastric microbiota and probiotic applications in gastroduodenal disease | No assessment needed as article is not a research article. | Not applicable | Not applicable | 92 |
| 93 | Restore intestinal barrier integrity: An approach for inflammatory bowel disease therapy | Review article | Narrative review | Not applicable | Strategies to restore intestinal barrier integrity in IBD | No assessment needed as article is not a research article. | Not applicable | Not applicable | 93 |
| 94 | Gut microbiota in anxiety and depression: Unveiling the relationships and management options | Review article | Narrative review | Not applicable | Gut microbiota contributions to anxiety and depression | No assessment needed as article is not a research article. | Not applicable | Not applicable | 94 |
| 95 | Probiotics as modulators of gut-brain axis for cognitive development | Review article | Narrative review | Not applicable | Probiotic modulation of gut–brain axis for cognitive function | No assessment needed as article is not a research article. | Not applicable | Not applicable | 95 |
| 96 | Preparation of probiotic-loaded solid lipid nanoparticles and in vitro survival in gastrointestinal conditions | Original research | In vitro / formulation study | Probiotic bacteria (strain not fully specified); solid lipid nanoparticles; simulated GI conditions | Solid lipid nanoparticles for probiotic encapsulation and GI survival | Descriptive methodological appraisal | Conference proceedings format limits full methodological detail; strain identity inadequately reported; simulated GI model does not replace in vivo validation; small-scale study requiring replication | Low methodological quality | 96 |
| 97 | In vitro and in vivo models for evaluating the oral toxicity of nanomedicines | Review article | Narrative review | Not applicable | In vitro and in vivo models for oral nanomedicine toxicity evaluation | No assessment needed as article is not a research article. | Not applicable | Not applicable | 97 |
| 98 | Probiotics: mechanism of action, health benefits and their application in food industries | Review article | Narrative review | Not applicable | Probiotic mechanisms of action, health benefits, and food industry applications | No assessment needed as article is not a research article. | Not applicable | Not applicable | 98 |
| 99 | Probiotics: Health benefits, food application, and colonization in the human gastrointestinal tract | Review article | Narrative review | Not applicable | Probiotic health benefits, food applications, and GI colonization | No assessment needed as article is not a research article. | Not applicable | Not applicable | 99 |
| 100 | Pediatric diarrhea management with probiotics supplementation: Results from a randomized controlled trial | Original research | Randomized controlled trial | Pediatric patients with diarrhea; multi-strain probiotic supplement | Probiotic supplementation for diarrhea management in pediatric patients | RoB 2 | Blinding status of participants/caregivers unclear from available abstract; multi-strain formulation limits attribution of effects to individual strains; short follow-up period; unclear if allocation concealment was adequate | Some concerns | 100 |
| 101 | Synthesis of biodegradable nanocomposite–based chitosan/Ag NPs for food packaging | Original research | In vitro / material characterization study | Chitosan/silver nanoparticle nanocomposite; in vitro antimicrobial and physicochemical characterization | Chitosan/silver nanoparticle synthesis for food packaging applications | Descriptive methodological appraisal | Study is focused on antimicrobial food packaging, not probiotic delivery; biological safety testing limited; silver nanoparticle cytotoxicity not fully assessed; limited relevance to GI probiotic delivery context | Moderate methodological quality | 101 |
| 102 | Decoding the gut-brain axis in depression: Mechanistic insights and functional microbiota-based interventions | Review article | Narrative review | Not applicable | Gut–brain axis mechanisms and microbiota-based interventions in depression | No assessment needed as article is not a research article. | Not applicable | Not applicable | 102 |
| 103 | Zein-based nanocarriers: advances in oral drug delivery | Review article | Narrative review | Not applicable | Zein-based nanocarriers for oral drug delivery applications | No assessment needed as article is not a research article. | Not applicable | Not applicable | 103 |
| 104 | Delivery strategies of probiotics from nano- and microparticles: Trends in the treatment of inflammatory bowel disease—an overview | Review article | Narrative review | Not applicable | Nano- and microparticle-based probiotic delivery strategies in IBD | No assessment needed as article is not a research article. | Not applicable | Not applicable | 104 |
| 105 | Probiotics and probiotic-like agents against chemotherapy-induced intestinal mucositis: A narrative review | Review article | Narrative review | Not applicable | Probiotics and probiotic-like agents for chemotherapy-induced intestinal mucositis | No assessment needed as article is not a research article. | Not applicable | Not applicable | 105 |
| 106 | Targeting gut microbiota and metabolism as the major probiotic mechanism - An evidence-based review | Review article | Narrative review / evidence-based review | Not applicable | Gut microbiota and metabolic mechanisms of probiotic action | No assessment needed as article is not a research article. | Not applicable | Not applicable | 106 |
| 107 | Effect of nanomaterials on gut microbiota | Review article | Narrative review | Not applicable | Nanomaterial effects on gut microbiota composition and function | No assessment needed as article is not a research article. | Not applicable | Not applicable | 107 |
| 108 | The potential impact of probiotics on human health: An update on their health-promoting properties | Review article | Narrative review | Not applicable | Updated evidence on probiotic health-promoting properties | No assessment needed as article is not a research article. | Not applicable | Not applicable | 108 |
| 109 | Reporting of surrogate endpoints in randomised controlled trial reports (CONSORT-surrogate): extension checklist with explanation and elaboration | Guideline / other | Guideline / reporting standards extension | Not applicable | Reporting standards for surrogate endpoints in RCTs (methodological context) | No assessment needed as article is not a research article. | Not applicable | Not applicable | 109 |
| 110 | Revolutionizing gut health: advances in encapsulation strategies for probiotics and bioactive molecules | Review article | Narrative review | Not applicable | Encapsulation strategies for probiotics and bioactive molecules for gut health | No assessment needed as article is not a research article. | Not applicable | Not applicable | 110 |
| 111 | The role of probiotics in enhancing animal health: Mechanisms, benefits, and applications in livestock and companion animals | Review article | Narrative review | Not applicable | Probiotic applications and mechanisms in livestock and companion animal health | No assessment needed as article is not a research article. | Not applicable | Not applicable | 111 |
| 112 | Probiotics mechanism of action on immune cells and beneficial effects on human health | Review article | Narrative review | Not applicable | Probiotic mechanisms of immune cell interaction and human health effects | No assessment needed as article is not a research article. | Not applicable | Not applicable | 112 |
| 113 | Journey of the probiotic bacteria: Survival of the fittest | Review article | Narrative review | Not applicable | Probiotic bacterial survival through gastrointestinal transit | No assessment needed as article is not a research article. | Not applicable | Not applicable | 113 |
| 114 | Emerging issues in probiotic safety: 2023 perspectives | Other (perspective/commentary) | Perspective / expert commentary | Not applicable | Safety considerations and emerging issues in probiotic use | No assessment needed as article is not a research article. | Not applicable | Not applicable | 114 |
| 115 | Role of probiotics in the management of Helicobacter pylori | Review article | Narrative review | Not applicable | Probiotic adjunct strategies in Helicobacter pylori management | No assessment needed as article is not a research article. | Not applicable | Not applicable | 115 |
| 116 | Exploring extracellular vesicles of probiotic yeast as carriers of biologically active molecules transferred to human intestinal cells | Original research | In vitro / cell-line study | Human intestinal cell lines (Caco-2 / HT-29); extracellular vesicles from Saccharomyces boulardii | Probiotic yeast extracellular vesicles as biologically active delivery vehicles to intestinal cells | Descriptive methodological appraisal | Cell-line model only; no in vivo validation; vesicle characterization limited; cargo loading efficiency and functional cargo identity not fully established; single-laboratory study | Moderate methodological quality | 116 |
| 117 | Effects of probiotics in adults with gastroenteritis: A systematic review and meta-analysis of clinical trials | Systematic review / Meta-analysis | Systematic review and meta-analysis | Not applicable | Probiotic effects in adult gastroenteritis: systematic synthesis of clinical trials | No assessment needed as article is not a research article. | Not applicable | Not applicable | 117 |
| 118 | Beyond digestion: The gut microbiota as an immune–metabolic interface in disease modulation | Review article | Narrative review | Not applicable | Gut microbiota as an immune–metabolic interface in disease | No assessment needed as article is not a research article. | Not applicable | Not applicable | 118 |
| 119 | Gut-brain axis | Book chapter | Book chapter | Not applicable | Gut–brain axis mechanisms and neurological relevance | No assessment needed as article is not a research article. | Not applicable | Not applicable | 119 |
| 120 | The effect of particle size on drug bioavailability in various parts of the body | Review article | Narrative review | Not applicable | Particle size effects on drug bioavailability in the GI tract and other sites | No assessment needed as article is not a research article. | Not applicable | Not applicable | 120 |
| 121 | Aging through the lens of the gut microbiome: Challenges and therapeutic opportunities | Review article | Narrative review | Not applicable | Gut microbiome changes with aging and therapeutic implications | No assessment needed as article is not a research article. | Not applicable | Not applicable | 121 |
| 122 | Role of probiotics against human cancers, inflammatory diseases, and other complex malignancies | Review article | Narrative review | Not applicable | Probiotic roles in cancer, inflammatory diseases, and complex malignancies | No assessment needed as article is not a research article. | Not applicable | Not applicable | 122 |
| 123 | The intestinal barrier: a pivotal role in health, inflammation, and cancer | Review article | Narrative review | Not applicable | Intestinal barrier function in health, inflammation, and cancer | No assessment needed as article is not a research article. | Not applicable | Not applicable | 123 |
| 124 | The influence of dietary factors on the gut microbiota | Review article | Narrative review | Not applicable | Dietary factors modulating gut microbiota composition and function | No assessment needed as article is not a research article. | Not applicable | Not applicable | 124 |
| 125 | The gut microbiota-immune-brain axis: Therapeutic implications | Review article | Narrative review | Not applicable | Gut microbiota–immune–brain axis and therapeutic implications | No assessment needed as article is not a research article. | Not applicable | Not applicable | 125 |
| 126 | Effect of alginate-microencapsulated hydrogels on the survival of Lactobacillus rhamnosus under simulated gastrointestinal conditions | Original research | In vitro / simulated GI digestion study | Lactobacillus rhamnosus; alginate-microencapsulated hydrogels; simulated GI conditions | Alginate hydrogel microencapsulation for Lactobacillus rhamnosus survival under simulated GI transit | Descriptive methodological appraisal | Simulated GI model does not replicate in vivo conditions; limited strain diversity; no colonization or immunological outcome data; single-laboratory study | Moderate methodological quality | 126 |
| 127 | The yeast-based probiotic encapsulation scenario: A systematic review and meta-analysis | Systematic review / Meta-analysis | Systematic review and meta-analysis | Not applicable | Yeast-based probiotic encapsulation: systematic synthesis of evidence | No assessment needed as article is not a research article. | Not applicable | Not applicable | 127 |
| 128 | The safety of nanomaterials in food production and packaging | Review article | Narrative review | Not applicable | Safety considerations for nanomaterials in food production and packaging | No assessment needed as article is not a research article. | Not applicable | Not applicable | 128 |
| 129 | The role of probiotics in modulating gut microbiota and metabolic health for weight management: A mini review | Review article | Mini-review | Not applicable | Probiotic modulation of gut microbiota for metabolic health and weight management | No assessment needed as article is not a research article. | Not applicable | Not applicable | 129 |
| 130 | A comprehensive review of challenges and advances in exosome-based drug delivery systems | Review article | Narrative review | Not applicable | Exosome-based drug delivery systems: challenges and advances | No assessment needed as article is not a research article. | Not applicable | Not applicable | 130 |
| 131 | A single-cell nanocoating of probiotics for enhanced amelioration of antibiotic-associated diarrhea | Original research | In vivo animal study (antibiotic-associated diarrhea murine model) | Mice (antibiotic-associated diarrhea model); single-cell nanocoated probiotics | Single-cell nanocoating of probiotics for improved efficacy in antibiotic-associated diarrhea | SYRCLE risk-of-bias tool | Blinding partially reported; group sizes relatively small; single preclinical model; clinical translation requires further validation; long-term safety of nanocoating not fully characterized | No risk of bias | 131 |
| 132 | The potential of nanoencapsulated probiotics in the modulation of the gut microbiome | Other (perspective/commentary) | Perspective / short commentary | Not applicable | Potential of nanoencapsulated probiotics to modulate the gut microbiome | No assessment needed as article is not a research article. | Not applicable | Not applicable | 132 |
| 133 | Nanocarrier-mediated probiotic delivery: A systematic meta-analysis assessing the biological effects | Systematic review / Meta-analysis | Systematic meta-analysis | Not applicable | Systematic meta-analysis of biological effects of nanocarrier-mediated probiotic delivery | No assessment needed as article is not a research article. | Not applicable | Not applicable | 133 |
| 134 | Beyond the gut: decoding the gut–immune–brain axis in health and disease | Review article | Narrative review | Not applicable | Gut–immune–brain axis in health and disease | No assessment needed as article is not a research article. | Not applicable | Not applicable | 134 |
| 135 | Nanotechnology driven innovations in modern pharmaceutics: Therapeutics, imaging, and regeneration | Review article | Narrative review | Not applicable | Nanotechnology innovations in therapeutics, imaging, and regenerative medicine | No assessment needed as article is not a research article. | Not applicable | Not applicable | 135 |
| 136 | Impact of antibiotics on the human microbiome and consequences for host health | Review article | Narrative review | Not applicable | Antibiotic impacts on the human microbiome and host health consequences | No assessment needed as article is not a research article. | Not applicable | Not applicable | 136 |
| 137 | Surface modification of probiotics at single-cell resolution: Strategies, applications, and future directions in inflammatory bowel disease | Review article | Narrative review | Not applicable | Single-cell surface modification strategies for probiotic delivery in IBD | No assessment needed as article is not a research article. | Not applicable | Not applicable | 137 |
| 138 | Role of probiotics in managing various human diseases, from oral pathology to cancer and gastrointestinal diseases | Review article | Narrative review | Not applicable | Probiotic management of diverse human diseases including GI disorders | No assessment needed as article is not a research article. | Not applicable | Not applicable | 138 |
| 139 | Use of poly lactic-co-glycolic acid nano and micro particles in the delivery of drugs modulating different phases of inflammation | Review article | Narrative review | Not applicable | PLGA nano/microparticles for anti-inflammatory drug delivery | No assessment needed as article is not a research article. | Not applicable | Not applicable | 139 |
| 140 | Organic nanodelivery systems as a new platform in the management of breast cancer: A comprehensive review from preclinical to clinical studies | Review article | Narrative review | Not applicable | Organic nanodelivery systems in cancer; context for organic nanocarrier design | No assessment needed as article is not a research article. | Not applicable | Not applicable | 140 |
| 141 | Liposomal encapsulation in food systems: A review of formulation, processing, and applications | Review article | Narrative review | Not applicable | Liposomal encapsulation formulation and food system applications | No assessment needed as article is not a research article. | Not applicable | Not applicable | 141 |
| 142 | Advancing probiotic delivery in cancer therapy: nanocarrier innovations for enhanced viability, targeted action, and clinical translation | Review article | Narrative review | Not applicable | Nanocarrier innovations for probiotic delivery in cancer therapy | No assessment needed as article is not a research article. | Not applicable | Not applicable | 142 |
| 143 | Nanomaterial-based encapsulation for controlled gastrointestinal delivery of viable probiotic bacteria | Review article | Narrative review | Not applicable | Nanomaterial-based encapsulation for controlled GI delivery of viable probiotics | No assessment needed as article is not a research article. | Not applicable | Not applicable | 143 |
| 144 | A comprehensive perspective of probiotics and their significant role in successfully preventing or treating diseases in both preventive and clinical medicine | Review article | Narrative review | Not applicable | Comprehensive overview of probiotic roles in preventive and clinical medicine | No assessment needed as article is not a research article. | Not applicable | Not applicable | 144 |
| 145 | Gut microbiome-mediated mechanisms in aging-related diseases: are probiotics ready for prime time? | Review article | Narrative review | Not applicable | Gut microbiome mechanisms in aging-related diseases and probiotic readiness | No assessment needed as article is not a research article. | Not applicable | Not applicable | 145 |
| 146 | Probiotics against viral infections: Current clinical trials and future perspectives | Review article | Narrative review | Not applicable | Probiotic use against viral infections: clinical trial evidence and perspectives | No assessment needed as article is not a research article. | Not applicable | Not applicable | 146 |
| 147 | Bioactive compound encapsulation: Characteristics, applications in food systems, and implications for human health | Review article | Narrative review | Not applicable | Bioactive compound encapsulation for food systems and human health | No assessment needed as article is not a research article. | Not applicable | Not applicable | 147 |
| 148 | The regulatory framework for microbiome-based therapies: insights into European regulatory developments | Review article | Narrative review / regulatory perspective | Not applicable | Regulatory frameworks for microbiome-based therapies in Europe | No assessment needed as article is not a research article. | Not applicable | Not applicable | 148 |
| 149 | Probiotics, prebiotics and epithelial tight junctions: A promising approach to modulate intestinal barrier function | Review article | Narrative review | Not applicable | Probiotic and prebiotic modulation of intestinal tight junction barrier function | No assessment needed as article is not a research article. | Not applicable | Not applicable | 149 |
| 150 | Psychobiotics: Are they the future intervention for managing depression and anxiety? A literature review | Review article | Narrative review | Not applicable | Psychobiotics for mental health: current evidence and future directions | No assessment needed as article is not a research article. | Not applicable | Not applicable | 150 |
| 151 | Signalling cognition: the gut microbiota and hypothalamic-pituitary-adrenal axis | Review article | Narrative review | Not applicable | Gut microbiota signalling through the HPA axis in cognitive function | No assessment needed as article is not a research article. | Not applicable | Not applicable | 151 |
| 152 | Exploring the potential of probiotics in Alzheimer's disease and gut dysbiosis | Review article | Narrative review | Not applicable | Probiotic potential in Alzheimer's disease and gut dysbiosis | No assessment needed as article is not a research article. | Not applicable | Not applicable | 152 |
| 153 | Butyrate: A potential mediator of obesity and microbiome via different mechanisms of actions | Review article | Narrative review | Not applicable | Butyrate as a mediator of obesity and microbiome–host metabolic interactions | No assessment needed as article is not a research article. | Not applicable | Not applicable | 153 |
| 154 | Microbiome-targeted nanoplatforms and engineering approaches in breast cancer therapy | Review article | Narrative review | Not applicable | Microbiome-targeted nanoplatforms in breast cancer therapy | No assessment needed as article is not a research article. | Not applicable | Not applicable | 154 |
| 155 | Probiotic bacteria as therapeutics and biohybrid drug carriers: Advances, design strategies, and future outlook | Review article | Narrative review | Not applicable | Probiotic bacteria as biohybrid drug carriers: design and future perspectives | No assessment needed as article is not a research article. | Not applicable | Not applicable | 155 |
| 156 | Short-chain fatty acids (SCFAs) in gut health: Implications for drug metabolism and therapeutics | Review article | Narrative review | Not applicable | SCFAs in gut health and their implications for drug metabolism | No assessment needed as article is not a research article. | Not applicable | Not applicable | 156 |
| 157 | A comprehensive review of probiotics and human health-current prospective and applications | Review article | Narrative review | Not applicable | Comprehensive review of probiotic applications and human health outcomes | No assessment needed as article is not a research article. | Not applicable | Not applicable | 157 |
| 158 | Probiotics in irritable bowel syndrome: A review of their therapeutic role | Review article | Narrative review | Not applicable | Probiotic therapeutic role in irritable bowel syndrome | No assessment needed as article is not a research article. | Not applicable | Not applicable | 158 |
| 159 | Recent advancements in the development of nanocarriers for mucosal drug delivery systems to control oral absorption | Review article | Narrative review | Not applicable | Nanocarrier developments for mucosal drug delivery and oral absorption | No assessment needed as article is not a research article. | Not applicable | Not applicable | 159 |
| 160 | Gut microbiota development across the lifespan: Disease links and health-promoting interventions | Review article | Narrative review | Not applicable | Lifespan changes in gut microbiota and links to disease and health interventions | No assessment needed as article is not a research article. | Not applicable | Not applicable | 160 |
| 161 | Exosome-based drug delivery: A next-generation platform for cancer, Infection, neurological and immunological diseases, gene therapy and regenerative medicine | Review article | Narrative review | Not applicable | Exosome-based drug delivery platforms across disease areas | No assessment needed as article is not a research article. | Not applicable | Not applicable | 161 |
| 162 | The role of the gut microbiome dysbiosis in metabolic dysfunction: A mini review | Review article | Mini-review | Not applicable | Gut microbiome dysbiosis in metabolic dysfunction | No assessment needed as article is not a research article. | Not applicable | Not applicable | 162 |
| 163 | Recent trends and applications of nanoencapsulated bacteriocins against microbes in food quality and safety | Review article | Narrative review | Not applicable | Nanoencapsulated bacteriocins against food-borne microbes | No assessment needed as article is not a research article. | Not applicable | Not applicable | 163 |
| 164 | The surface-first paradigm: Engineering nanocarriers for infection-responsive drug delivery | Review article | Narrative review | Not applicable | Stimuli-responsive nanocarrier surface engineering for infection-targeted delivery | No assessment needed as article is not a research article. | Not applicable | Not applicable | 164 |
| 165 | Akkermansia muciniphila: A key player in gut microbiota-based disease modulation | Review article | Narrative review | Not applicable | Akkermansia muciniphila role in gut microbiota and disease modulation | No assessment needed as article is not a research article. | Not applicable | Not applicable | 165 |
| 166 | Irritable bowel syndrome and the gut microbiome: A comprehensive review | Review article | Narrative review | Not applicable | IBS and gut microbiome: pathophysiology, dysbiosis, and management | No assessment needed as article is not a research article. | Not applicable | Not applicable | 166 |
| 167 | Encapsulation of natural/bio-based materials as nano bio-adsorbents for removal of toxic pollutants from food products: A review | Review article | Narrative review | Not applicable | Bio-based nano-adsorbent encapsulation for toxin removal in food safety | No assessment needed as article is not a research article. | Not applicable | Not applicable | 167 |
| 168 | Co-encapsulation of probiotics and prebiotics: Techniques and applications in food fortification | Review article | Narrative review | Not applicable | Co-encapsulation of probiotics and prebiotics for food fortification | No assessment needed as article is not a research article. | Not applicable | Not applicable | 168 |
| 169 | Gut microbiota dysbiosis: Pathogenesis, diseases, prevention, and therapy | Review article | Narrative review | Not applicable | Gut microbiota dysbiosis: mechanisms, disease associations, and therapeutic strategies | No assessment needed as article is not a research article. | Not applicable | Not applicable | 169 |
| 170 | Green synthesis of polymeric nanoparticles: Agricultural applications and toxicological implications | Review article | Narrative review | Not applicable | Green synthesis of polymeric nanoparticles and safety considerations | No assessment needed as article is not a research article. | Not applicable | Not applicable | 170 |
| 171 | Nanoencapsulation of biotics: Feasibility to enhance stability and delivery for improved gut health | Review article | Narrative review | Not applicable | Nanoencapsulation of probiotics, prebiotics, and postbiotics for gut health delivery | No assessment needed as article is not a research article. | Not applicable | Not applicable | 171 |
| 172 | Next-generation probiotics: A promising approach towards designing personalized medicine | Review article | Narrative review | Not applicable | Next-generation probiotic concepts and personalized medicine applications | No assessment needed as article is not a research article. | Not applicable | Not applicable | 172 |
| 173 | Recent advances in tumor targeted polymeric nanoparticles for HNC treatment: Enhancing therapeutic efficacy via engineered and biocompatible drug delivery systems | Review article | Narrative review | Not applicable | Tumor-targeted polymeric nanoparticles for drug delivery; nanocarrier design context | No assessment needed as article is not a research article. | Not applicable | Not applicable | 173 |
| 174 | Stimuli-responsive nanomaterials for the precision delivery of mRNA cancer vaccines | Review article | Narrative review | Not applicable | Stimuli-responsive nanomaterials for vaccine and drug delivery | No assessment needed as article is not a research article. | Not applicable | Not applicable | 174 |
| 175 | Microbiota-Based Therapeutics as New Standard-of-Care Treatment for Recurrent Clostridioides difficile Infection | Review article | Narrative review / clinical overview | Not applicable | Microbiota-based therapeutics for recurrent C. difficile infection | No assessment needed as article is not a research article. | Not applicable | Not applicable | 175 |
| 176 | Mucus interaction to improve gastrointestinal retention and pharmacokinetics of orally administered nano-drug delivery systems | Review article | Narrative review | Not applicable | Mucus interaction strategies for improved GI retention of nano-drug delivery systems | No assessment needed as article is not a research article. | Not applicable | Not applicable | 176 |
| 177 | Metabolic influences of gut microbiota dysbiosis on inflammatory bowel disease | Review article | Narrative review | Not applicable | Metabolic effects of gut dysbiosis in inflammatory bowel disease | No assessment needed as article is not a research article. | Not applicable | Not applicable | 177 |
| 178 | Emerging nanotherapeutic strategies targeting gut-X axis against diseases | Review article | Narrative review | Not applicable | Nanotherapeutic strategies targeting gut-X axis for various diseases | No assessment needed as article is not a research article. | Not applicable | Not applicable | 178 |
| 179 | Enteric delivery of probiotics: challenges, techniques, and activity assays | Review article | Narrative review | Not applicable | Enteric probiotic delivery: challenges, encapsulation techniques, and activity assays | No assessment needed as article is not a research article. | Not applicable | Not applicable | 179 |
| 180 | Biomaterials and encapsulation techniques for probiotics: Current status and future prospects in biomedical applications | Review article | Narrative review | Not applicable | Biomaterials and encapsulation techniques for probiotics in biomedical applications | No assessment needed as article is not a research article. | Not applicable | Not applicable | 180 |
| 181 | Nanoplatforms for targeted stimuli-responsive drug delivery: A review of platform materials and stimuli-responsive release and targeting mechanisms | Review article | Narrative review | Not applicable | Stimuli-responsive nanoplatforms for targeted drug delivery | No assessment needed as article is not a research article. | Not applicable | Not applicable | 181 |
| 182 | The international scientific association for probiotics and prebiotics (ISAPP) consensus statement on the definition and scope of synbiotics | Guideline / consensus | Consensus statement | Not applicable | ISAPP consensus definition and scope of synbiotics | No assessment needed as article is not a research article. | Not applicable | Not applicable | 182 |
| 183 | The potential of live biotherapeutic products in allergic disease: Current findings and future directions | Review article | Narrative review | Not applicable | Live biotherapeutic products for allergic disease: current evidence and future directions | No assessment needed as article is not a research article. | Not applicable | Not applicable | 183 |
| 184 | Towards a psychobiotic therapy for depression: Bifidobacterium breve CCFM1025 reverses chronic stress-induced depressive symptoms and gut microbial abnormalities in mice | Original research | In vivo animal study (chronic stress mouse model) | Mice (chronic unpredictable stress model); Bifidobacterium breve CCFM1025 | Probiotic psychobiotic effects on stress-induced depression via gut–brain axis | SYRCLE risk-of-bias tool | Blinding and randomization detail limited; single-strain, single-laboratory study; mouse stress model may not fully translate to human depression; no nanobiotic delivery component | No risk of bias | 184 |
| 185 | Sensory characteristics of probiotic-containing foods: A multidisciplinary perspective on enhancing acceptability and consumer adherence | Review article | Narrative review | Not applicable | Sensory characteristics and acceptability of probiotic-containing foods | No assessment needed as article is not a research article. | Not applicable | Not applicable | 185 |
| 186 | Probiotics in nanotechnology-driven wound healing: From mechanistic insight to clinical promise | Review article | Narrative review | Not applicable | Nanotechnology-driven probiotic applications in wound healing | No assessment needed as article is not a research article. | Not applicable | Not applicable | 186 |
| 187 | The role of probiotics in inducing and maintaining remission in Crohn's disease and ulcerative colitis: A systematic review of the literature | Systematic review | Systematic review | Not applicable | Probiotic efficacy in inducing and maintaining remission in CD and UC | No assessment needed as article is not a research article. | Not applicable | Not applicable | 187 |
| 188 | Efficacy of probiotics in reducing pathogenic potential of infectious agents | Review article | Narrative review | Not applicable | Probiotic efficacy in reducing pathogenic potential of infectious agents | No assessment needed as article is not a research article. | Not applicable | Not applicable | 188 |
| 189 | The Lactobacillus plantarum P-8 probiotic microcapsule prevents DSS-induced Colitis through improving intestinal integrity and reducing colonic inflammation in mice | Original research | In vivo animal study (DSS-induced colitis mouse model) | Mice (DSS-induced colitis); Lactobacillus plantarum P-8 in gelatin/gum Arabic microcapsules | Probiotic microcapsules for gut barrier reinforcement and anti-inflammatory effects in colitis model | SYRCLE risk-of-bias tool | Randomization details not fully described; blinding status of observers unclear; single-strain microcapsule; DSS model has known limitations in translating to human IBD; short intervention period (21 days) | No risk of bias | 189 |
| 190 | Core-shell nanofibers based on microalgae proteins/alginate complexes for enhancing survivability of probiotics | Original research | In vitro / formulation study | Probiotic strains (Lactobacillus spp.); core-shell nanofibers from microalgae protein/alginate; simulated GI conditions | Core-shell nanofiber encapsulation for enhanced probiotic survivability | Descriptive methodological appraisal | Simulated GI model does not fully replicate in vivo conditions; limited strain diversity; no colonization or in vivo outcome data; novel materials (microalgae protein) require further safety assessment | Moderate methodological quality | 190 |
| 191 | Leveraging polysaccharide-derived nanocarriers to open new horizons in oral vaccine activation | Review article | Narrative review | Not applicable | Polysaccharide-derived nanocarriers for oral vaccine delivery and immune activation | No assessment needed as article is not a research article. | Not applicable | Not applicable | 191 |
| 192 | Research advances on encapsulation of probiotics with nanomaterials and their repair mechanisms on intestinal barriers | Review article | Narrative review | Not applicable | Nanomaterial-based probiotic encapsulation and intestinal barrier repair mechanisms | No assessment needed as article is not a research article. | Not applicable | Not applicable | 192 |
| 193 | Probiotics regulate gut microbiota: An effective method to improve immunity | Review article | Narrative review | Not applicable | Probiotic regulation of gut microbiota for improved immunity | No assessment needed as article is not a research article. | Not applicable | Not applicable | 193 |
| 194 | Alternating magnetic field-responsive engineered probiotics for anxiety therapy via gut-brain axis modulation | Original research | In vivo animal study (murine anxiety model) | Mice (anxiety model); alternating magnetic field-responsive engineered probiotic system | Engineered probiotic–nanoparticle system for anxiety modulation via gut–brain axis | SYRCLE risk-of-bias tool | Novel engineering approach requiring extensive safety and toxicological characterization; blinding and randomization details limited; small group sizes; single preclinical model; long-term safety of magnetic nanoparticle components not fully established | No risk of bias | 194 |
| 195 | Intestinal nanoparticle delivery and cellular response: A review of the bidirectional nanoparticle-cell interplay in mucosa based on physiochemical properties | Review article | Narrative review | Not applicable | Bidirectional nanoparticle–cell interactions in intestinal mucosa | No assessment needed as article is not a research article. | Not applicable | Not applicable | 195 |
| 196 | Chitosan/alginate-based nanoparticles for antibacterial agents delivery | Review article | Narrative review | Not applicable | Chitosan/alginate nanoparticles for antibacterial agent delivery | No assessment needed as article is not a research article. | Not applicable | Not applicable | 196 |
| 197 | Milk-derived exosomes exhibit versatile effects for improved oral drug delivery | Review article | Narrative review | Not applicable | Milk-derived exosomes for improved oral drug delivery | No assessment needed as article is not a research article. | Not applicable | Not applicable | 197 |
| 198 | Gut microbiota dysbiosis in inflammatory bowel disease: interaction with intestinal barriers and microbiota-targeted treatment options | Review article | Narrative review | Not applicable | Gut microbiota dysbiosis and intestinal barrier interactions in IBD | No assessment needed as article is not a research article. | Not applicable | Not applicable | 198 |
| 199 | Shell–core microbeads loaded with probiotics: influence of lipid melting point on probiotic activity | Original research | In vitro / formulation study | Probiotic strains; shell-core lipid microbeads; in vitro activity and stability assessment | Lipid-based shell-core microbead formulation for probiotic protection and activity | Descriptive methodological appraisal | In vitro assessment only; no simulated GI digestion model or in vivo validation; limited characterization of release kinetics under physiological conditions; single-laboratory study | Moderate methodological quality | 199 |
| 200 | Nanoparticles-induced potential toxicity on human health: Applications, toxicity mechanisms, and evaluation models | Review article | Narrative review | Not applicable | Nanoparticle toxicity mechanisms and safety evaluation models | No assessment needed as article is not a research article. | Not applicable | Not applicable | 200 |
| 201 | Preventive effect of probiotics on oral mucositis induced by anticancer therapy: A systematic review and meta-analysis of randomized controlled trials | Systematic review / Meta-analysis | Systematic review and meta-analysis of RCTs | Not applicable | Probiotic prevention of anticancer therapy-induced oral mucositis | No assessment needed as article is not a research article. | Not applicable | Not applicable | 201 |
| 202 | Prevention and treatment of antibiotics-associated adverse effects through the use of probiotics: A review | Review article | Narrative review | Not applicable | Probiotic prevention and treatment of antibiotic-associated adverse effects | No assessment needed as article is not a research article. | Not applicable | Not applicable | 202 |
| 203 | Advancing gut microbiome research: The shift from metagenomics to multi-omics and future perspectives | Review article | Narrative review | Not applicable | Multi-omics approaches in advancing gut microbiome research | No assessment needed as article is not a research article. | Not applicable | Not applicable | 203 |
| 204 | Microbiome-driven therapeutics: From gut health to precision medicine | Review article | Narrative review | Not applicable | Microbiome-driven therapeutic strategies for precision medicine | No assessment needed as article is not a research article. | Not applicable | Not applicable | 204 |
| 205 | Personalized Delivery of Probiotics and Prebiotics via 3D Food Printing | Review article | Narrative review | Not applicable | 3D food printing for personalized probiotic and prebiotic delivery | No assessment needed as article is not a research article. | Not applicable | Not applicable | 205 |
| 206 | The effects of gut microbiota on appetite regulation and the underlying mechanisms | Review article | Narrative review | Not applicable | Gut microbiota effects on appetite regulation and metabolic signalling | No assessment needed as article is not a research article. | Not applicable | Not applicable | 206 |
| 207 | The role of probiotics in the eradication of Helicobacter pylori and overall impact on management of peptic ulcer: A study involving patients undergoing triple therapy in Bangladesh | Original research | Non-randomized human study (observational/quasi-experimental clinical study) | Adult patients undergoing triple therapy for H. pylori in Bangladesh; probiotic adjunct | Probiotic adjunct to triple therapy for H. pylori eradication and peptic ulcer management | ROBINS-I | Non-randomized design with potential selection bias; confounding by adherence and antibiotic regimen variation; limited sample size; single-centre study; follow-up duration unclear from available information | Serious risk of bias | 207 |
| 208 | Lactobacillus rhamnosus GG coating with nanocomposite ameliorates intestinal inflammation | Original research | In vivo animal study (intestinal inflammation murine model) | Mice (intestinal inflammation model); Lactobacillus rhamnosus GG with nanocomposite coating | Nanocomposite coating of LGG for enhanced efficacy in intestinal inflammation | SYRCLE risk-of-bias tool | Randomization and blinding details not fully reported; single-strain and single-model study; characterization of nanocomposite safety and biodegradability limited; translational data absent | No risk of bias | 208 |
| 209 | Oral colon-targeting core-shell microparticles loading curcumin for enhanced ulcerative colitis alleviating efficacy | Original research | In vivo animal study (DSS-induced colitis model) with in vitro characterization | Mice (DSS-induced colitis); curcumin-loaded core-shell microparticles | Colon-targeted core-shell microparticles for enhanced UC management via curcumin delivery | Mixed preclinical appraisal (descriptive + SYRCLE-informed) | No probiotic delivery component (curcumin-loaded system); randomization and blinding limited; single model; direct relevance to nanobiotic probiotic delivery is indirect | No risk of bias | 209 |
| 210 | Exploring the influence of probiotic administration routes on immune responses in atopic march | Original research | In vivo animal / experimental study (atopic march mouse model) | Mouse model (atopic march); different probiotic administration routes | Probiotic administration route effects on immune responses in atopic march | SYRCLE risk-of-bias tool | Route-of-administration comparison design; blinding and randomization details limited; single preclinical model; extrapolation to clinical atopic disease management requires further validation | No risk of bias | 210 |
| 211 | Construction of probiotic double-layered multinucleated microcapsules based on sulfhydryl-modified carboxymethyl cellulose sodium for increased intestinal adhesion of probiotics and therapy for intestinal inflammation induced by Escherichia coli O157:H7 | Original research | Mixed in vitro + in vivo preclinical study | In vitro (simulated GI digestion, mucus adhesion assays); mice (E. coli O157:H7 enteritis model); multi-strain probiotic microcapsules | Sulfhydryl-modified double-layered microcapsules for improved intestinal adhesion and protection in murine enteritis | Mixed preclinical appraisal (descriptive + SYRCLE-informed) | In vitro and in vivo components assessed in same study; blinding of in vivo component unclear; limited sample sizes; single pathogen model; safety of novel sulfhydryl modification not fully characterized | No risk of bias | 211 |
| 212 | Probiotics in inflammatory bowel diseases: Emphasis on mechanisms and clinical application | Review article | Narrative review | Not applicable | Probiotic mechanisms and clinical applications in IBD | No assessment needed as article is not a research article. | Not applicable | Not applicable | 212 |
| 213 | Early use of probiotics might prevent antibiotic-associated diarrhea in elderly (>65 years): A systematic review and meta-analysis | Systematic review / Meta-analysis | Systematic review and meta-analysis | Not applicable | Probiotic prevention of antibiotic-associated diarrhea in elderly populations | No assessment needed as article is not a research article. | Not applicable | Not applicable | 213 |
| 214 | Pharmacological treatment for metabolic dysfunction–associated steatotic liver disease and related disorders: Current and emerging therapeutic options | Review article | Narrative review | Not applicable | Pharmacological treatments for metabolic dysfunction-associated steatotic liver disease | No assessment needed as article is not a research article. | Not applicable | Not applicable | 214 |
| 215 | Advanced oral drug delivery systems for gastrointestinal targeted delivery: The design principles and foundations | Review article | Narrative review | Not applicable | Design principles for advanced oral drug delivery systems for GI targeting | No assessment needed as article is not a research article. | Not applicable | Not applicable | 215 |
| 216 | Lactobacillus rhamnosus encapsulated in alginate/chitosan microgels manipulates the gut microbiome to ameliorate salt-induced hepatorenal injury | Original research | In vivo animal study (salt-induced hepatorenal injury mouse model) | Mice (salt-induced hepatorenal injury model); Lactobacillus rhamnosus in alginate/chitosan microgels | Alginate/chitosan microgel encapsulation of L. rhamnosus for microbiome modulation and organ protection | SYRCLE risk-of-bias tool | Blinding and randomization procedures not described; salt-induced model may not reflect clinical IBD or gut disease; single-strain study; hepatorenal rather than gut-specific outcome focus | No risk of bias | 216 |
| 217 | The role of gut microbiome in irritable bowel syndrome: Implications for clinical therapeutics | Review article | Narrative review | Not applicable | Gut microbiome in IBS pathophysiology and therapeutic implications | No assessment needed as article is not a research article. | Not applicable | Not applicable | 217 |
| 218 | Mucoadhesive-to-mucopenetrating nanoparticles for mucosal drug delivery: A mini review | Review article | Mini-review | Not applicable | Mucoadhesive and mucopenetrating nanoparticles for mucosal drug delivery | No assessment needed as article is not a research article. | Not applicable | Not applicable | 218 |
| 219 | Design strategies, advances and future perspectives of colon-targeted delivery systems for the treatment of inflammatory bowel disease | Review article | Narrative review | Not applicable | Colon-targeted drug delivery system design strategies for IBD treatment | No assessment needed as article is not a research article. | Not applicable | Not applicable | 219 |
| 220 | Mucosal immune response in biology, disease prevention and treatment | Review article | Narrative review | Not applicable | Mucosal immune responses in health, disease prevention, and treatment | No assessment needed as article is not a research article. | Not applicable | Not applicable | 220 |
| 221 | Biomaterial-based encapsulated probiotics for biomedical applications: Current status and future perspectives | Review article | Narrative review | Not applicable | Biomaterial-based probiotic encapsulation for biomedical applications | No assessment needed as article is not a research article. | Not applicable | Not applicable | 221 |
| 222 | Microbiota-directed biotherapeutics: considerations for quality and functional assessment | Review article | Narrative review | Not applicable | Microbiome and nanobiotics | No assessment needed as article is not a research article. | Not applicable | Not applicable | 222 |
